# Supplementary material for: Electrocatalytic study of a 1,10-phenanthroline–cobalt(ii) metal complex catalyst supported on reduced graphene oxide towards oxygen reduction reaction
Source: Royal Society of Chemistry journal article supplement (doi:10.1039/c6ra04078k), 2016-01-01
Supplement: c6ra04078k1.pdf [file c6ra04078k1.pdf]

## Electronic Supplementary Information (ESI)

### Electrocatalytic study of 1,10-phenanthroline-cobalt(II) metal-complex catalyst supported on reduced graphene oxide towards oxygen reduction reaction

Cancan Ren,<sup>a</sup> Haibo Li,<sup>\*a</sup> Rui Li,<sup>a</sup> Shuling Xu,<sup>a</sup> Denghu Wei,<sup>c</sup> Wenjun Kang,<sup>a</sup> Lei Wang,<sup>a</sup> Liping Jia,<sup>a</sup> Bingchuan Yang,<sup>a</sup> and Jifeng Liu<sup>\*ab</sup>

<sup>a</sup>Shandong Provincial Key Laboratory of Chemical Energy Storage and Novel Cell Technology, Department of Chemistry, Liaocheng University, Liaocheng 252059, China

<sup>b</sup>Key Laboratory of Food Nutrition and Safety, Ministry of Education of China, Tianjin University of Science and Technology, Tianjin 300457, China

<sup>c</sup>School of Materials Science and Engineering, Liaocheng University, Liaocheng 252059, China

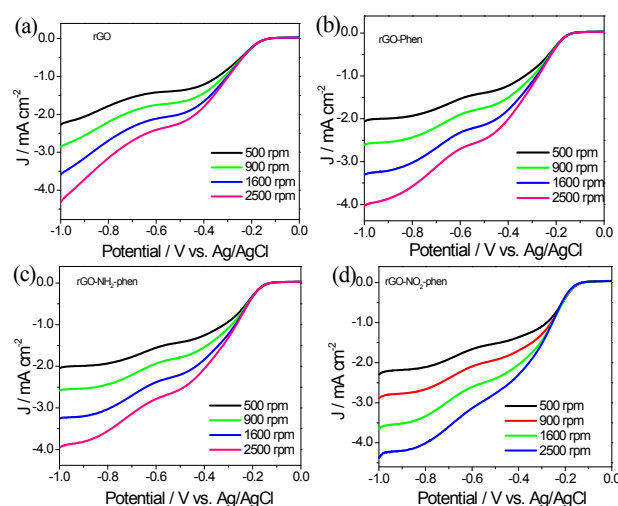

**Fig. S1** RDE LSV curves for (a) rGO, (b) rGO-Phen, (c) rGO-NH<sub>2</sub>-Phen, and (d) rGO-NO<sub>2</sub>-Phen at different rotation rates in O<sub>2</sub>-saturated 0.1 M KOH solution (scan

rate: 5 mV/s).

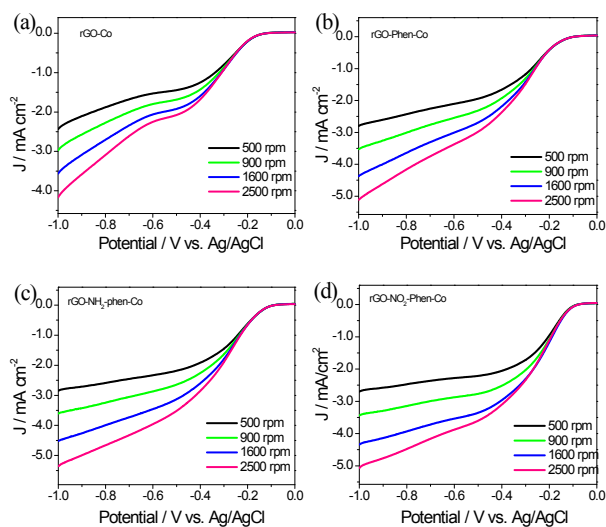

**Fig. S2** RDE LSV curves for (a) Co-RGO, (b) Phen-Co-RGO, (c) NH<sub>2</sub>-Phen-Co-RGO, and (d) NO<sub>2</sub>-Phen-Co-RGO at different rotation rates in O<sub>2</sub>-saturated 0.1 M KOH solution (scan rate: 5 mV/s).

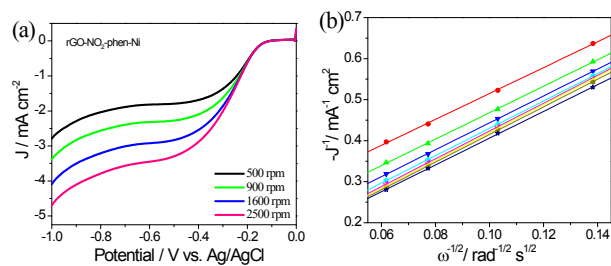

**Fig. S3** (a) RDE LSV curves for rGO-NO<sub>2</sub>-Phen-Ni at different rotation rates in O<sub>2</sub>-saturated 0.1 M KOH solution (scan rate: 5 mV/s) and (b) corresponding Koutecky–Levich plots ( $J^{-1}-\omega^{-1/2}$ ) at different potentials (from top to bottom:  $-0.35$ ,  $-0.40$ ,  $-0.45$ ,  $-0.50$ ,  $-0.55$ ,  $-0.60$ ,  $-0.65$ ,  $-0.70$  V).
